# Supplementary material for: Suppression of transgenerational lipid provisioning inhibits desiccation resistance, but not diapause, in the vector mosquito, Aedes albopictus
Source: Research Square preprint supplement (doi:10.21203/rs.3.rs-8302219/v1), 2026-01-30
Supplement: Supplementary file 1 [file 8e98891a0e72f4438144417e.xlsx]

## Sheet: Title Page
						Supplementary Material for:
						Suppression of transgenerational lipid provisioning inhibits desiccation resistance, but not diapause, in the vector mosquito, Aedes albopictus
						Mara Heilig1*, Marten J. Edwards2 and Peter A. Armbruster1
						1Department of Biology, Georgetown University, 37th and O Streets NW, Washington, DC, USA 20057
						2 Department of Biology, Muhlenberg College, 2400 W Chew St, Allentown, PA, USA 18104
						*Author for correspondence – mch284@georgetown.edu
						Keywords: transgenerational plasticity, overwinter biology, lipid energetics, diapause, Aedes albopictus

## Sheet: Supplemental Table S1
Supplemental Table S1. Primer sequences used for qPCR and amplification of template for dsRNA synthesis. Bold nucleotides in the sequence column dentote the T7 promoter flanking the gene-specific sequence.
Gene	Primer source / gene id	Direction	Sequence (5'-3')	Reaction	Product Size (bp)	R^2	Efficiency
RpS6	Noh et al. 2020 / LOC115267716	Forward	ACAAGCTGCGTCACTTCTACGACA	qPCR	110	99.8	1.1417
		Reverse	CTTGTCGTTTCCACCGGCAATCTT
lsd2	Reynolds et al. 2012 / LOC109427513	Forward	GGTCGAACTTGTGAACGAGCGGAG	qPCR	184	98.6	1.0265
		Reverse	CATCTGGAGTCGCTGGACCGTATG
dgat	LOC109418063	Forward	GCAGTGGATGATACCCTCGG	qPCR	167	99.2	0.9808
		Reverse	GCAGCTCTCCCATCAGGTTT
βgal	Heilig and Armbruster 2024 / lacZ from E. coli (DH5a/lacZ)	Forward	TGTGGAATTGTGAGCGGATA	dsRNA	189	NA	NA
		Reverse	TAAAACGACGGCCAGTGAAT
βgal	Heilig and Armbruster 2024 / lacZ from E. coli (DH5a/lacZ)	T7_Forward	TAATACGACTCACTATAGGGTGTGGAATTGTGAGCGGATA	dsRNA	209	NA	NA
		T7_Reverse	TAATACGACTCACTATAGGGTAAAACGACGGCCAGTGAAT
lsd2	LOC109427513	Forward	CCGAAGATGTCGAGGATGAT	dsRNA	490	NA	NA
		Reverse	GTTCGCTTATGGGTTTGCAT
lsd2	LOC109427513	T7_Forward	TAATACGACTCACTATAGGGCCGAAGATGTCGAGGATGAT	dsRNA	510	NA	NA
		T7_Reverse	TAATACGACTCACTATAGGGGTTCGCTTATGGGTTTGCAT
dgat	LOC109418063	Forward	TGGTGCACGTGGTTAACATT	dsRNA	377	NA	NA
		Reverse	TTCATAGCACAAAGTTGGCG
dgat	LOC109418063	T7_Forward	TAATACGACTCACTATAGGGTGGTGCACGTGGTTAACATT	dsRNA	397	NA	NA
		T7_Reverse	TAATACGACTCACTATAGGGTTCATAGCACAAAGTTGGCG

## Sheet: Supplemental Table S2
Supplemental Table S2. Summary of biological replicate sizes for each experiment.
		qRT-PCR			triglyceride quantification				starvation tolerance				dessication resistance				diapause incidence				diapause termination (88 days)				diapause termination (110 days)				diapause termination (142 days)				overwinter survival
		dslsd2	dsdgat1	dsβgal	dslsd2	dsdgat1	dsβgal	non-injected	dslsd2	dsdgat1	dsβgal	non-injected	dslsd2	dsdgat1	dsβgal	non-injected	dslsd2	dsdgat1	dsβgal	non-injected	dslsd2	dsdgat1	dsβgal	non-injected	dslsd2	dsdgat1	dsβgal	non-injected	dslsd2	dsdgat1	dsβgal	non-injected	dslsd2	dsdgat1	dsβgal	non-injected
Long Day	Number of replicate cages	8	8	8	6	6	6	6	8	8	8	8	6	6	6	6	8	8	8	8	NA	NA	NA	NA	NA	NA	NA	NA	NA	NA	NA	NA	NA	NA	NA	NA
	Average number of injected females (per replicate)	9	8.6	7.9	29.7	29.7	29.3	29.8	25.5	25.375	25.25	25	10.6667	10.3333	10	8.83333	31.8571	31.5	31.2308	31.5714	NA	NA	NA	NA	NA	NA	NA	NA	NA	NA	NA	NA	NA	NA	NA	NA
	Average number of eggs, larvae or pupae assayed (per replicate)	NA	NA	NA	441.5	459.7	411.5	429.8	37.375	31.75	32.375	34.5	449.333	424.333	357.833	474.667	101.625	106.75	117.25	143.5	NA	NA	NA	NA	NA	NA	NA	NA	NA	NA	NA	NA	NA	NA	NA	NA
Short Day	Number of replicate cages	4	4	4	6	6	6	6	25	25	16	22	9	9	9	9	12	11	12	12	17	19	22	23	18	20	20	25	18	16	21	20	30	28	26	26
	Average number of injected females (per replicate)	6.8	6.8	6.8	41.5	39.7	39.3	29.8	6	6	6	6	30.6667	29.3333	29.6667	25.8889	33.1667	33.2727	31.3333	29.6667	6	6	6	6	6	6	6	6	6	6	6	6	6	6	6	6
	Average number of eggs, larvae or pupae assayed (per replicate)	NA	NA	NA	425.7	426.2	410.7	429.8	7.68	6.44	9.5625	7.40909	411.167	423.333	778.111	474.667	137.667	148	142.917	156.917	27.9412	40.5789	42.9091	34.4783	36.8333	38.35	50.45	36.48	55.5	65.7059	61.7619	65.3	163.567	168.179	151.115	115.333
